# **Excitability changes in the motor cortex in preparation for self-paced and cue-guided movements: a transcranial magnetic stimulation study**

J. Ibáñez<sup>1</sup>, R. Hannah<sup>1,2</sup>, L. Rocchi<sup>1</sup>, J.C. Rothwell<sup>1</sup>

1. Department of Movement Disorders, Institute of Neurology, UCL, UK

2. Department of Psychology, University of California San Diego, USA

CORRESPONDENCE: Jaime Ibáñez, UCL Institute of Neurology, London, WC1N 3BG, UK, email: [j.ibanez@ucl.ac.uk](mailto:j.ibanez@ucl.ac.uk)

ABBREVIATED TITLE: Cortical excitability changes before cue-guided and self-paced movements

CONFLICT OF INTEREST: The authors declare no competing financial interests.

ACKNOWLEDGEMENTS: JI was supported in part by Grant No. #H2020-MSCA-IF-2015-700512 from the European Commission. RH was supported by the Biotechnology and Biological Sciences Research Council (BBSRC) (Grant No. BB/N016793/1).

1 **SIGNIFICANCE:**

2 Intuitive reasoning suggests that planning for a forthcoming movement should involve  
3 subthreshold preparation of motor commands. In reaction movements release of these  
4 commands is triggered by an external input whereas in self-paced tasks, movement  
5 could start as soon as preparation is complete. Here we provide evidence in humans  
6 using TMS of motor cortex that this is incorrect. Preparation for movement appears to  
7 involve the motor cortex entering a novel state characterised by a small reduction in  
8 overall excitability. This is then triggered into execution by either an external event, or,  
9 on the case of self-paced tasks, by an equivalent internal event.

10

11 **ABSTRACT:**

12 Reaction time tasks are characterised by two features: preparatory suppression of  
13 corticospinal excitability that precedes facilitation and movement onset; and  
14 intersensory facilitation, in which receipt of a second stimulus around the time of the  
15 imperative signal shortens reaction times. These are usually explained using a model of  
16 subthreshold accumulation of motor commands. Preparatory suppression prevents  
17 premature release of “subthreshold” commands; intersensory facilitation allows  
18 preparatory activity to reach threshold faster.

19 Here we question that interpretation by studying movements that are self-paced or timed  
20 with predictable external events. In all cases, corticospinal excitability evolves over the  
21 same time course regardless of movement type. Thus, inhibition is not a brake on  
22 release, it is an integral part of movement preparation. Similarly, intersensory  
23 facilitation-like effects occur in self-paced movements, suggesting that they require a

24 trigger event before movement is initiated. Intersensory facilitation is not seen in  
25 predictive movements, suggesting they use different mechanisms.

## 26 **Introduction**

27 Simple reaction time (RT) movements are usually viewed as the stimulus-triggered  
28 release of prepared, “subthreshold”, movement commands (Tanji and Evarts, 1976; Prut  
29 and Fetz, 1999). But what happens if movements are made without reference to an  
30 external trigger? For example, self-paced (SP) movements, or movements that are made  
31 to coincide with an external event rather than being triggered by it (“predictive” task:  
32 PT). If a movement is self-paced or predictive, then are movement commands still  
33 stored in advance and released by an internal trigger? Or does movement occur  
34 immediately preparation is complete? Perhaps no preparation is needed at all.

35 The aim of the present experiments was to compare movement preparation in these  
36 three types of movement (RT, PT and SP). In particular, we tested whether 2 key  
37 characteristics of RT movements differed in the three tasks.

38 The first characteristic was preparatory inhibition. In RT tasks, corticospinal excitability  
39 is reduced around the expected time of the imperative stimulus (Hasbroucq et al., 1997).  
40 This has been interpreted as preventing the premature release of the prepared  
41 “subthreshold” motor plan (Touge et al., 1998; Duque et al., 2010, 2017). It is  
42 compatible with data from animal experiments showing that there are changes in the  
43 firing of neurones in motor cortex at a time when there is no overt EMG activity in the  
44 periphery (Omrani et al., 2017). If preparatory inhibition is necessary to prevent  
45 premature release of movement commands (Duque et al., 2010), then it may be reduced  
46 in PT movements where the time to move is known, and it should not be present at all in  
47 SP movements when there is intentionally no constraint on the time of execution.

48 The second characteristic of RT movements investigated here was inter-sensory  
49 facilitation, in which the presence of a second sensory stimulus at around the time of the  
50 imperative stimulus reduces reaction times and speeds release of the prepared  
51 movement (Nickerson, 1973; Pascual-Leone et al., 1992b). It has been postulated that  
52 the additional input shortens the time taken to identify the imperative stimulus (Pascual-  
53 Leone et al., 1992b). SP and PT movements may not require an external trigger since  
54 they could start immediately preparation was complete. If so they would not display  
55 inter-sensory facilitation.

56 Recent work on the relationship between movement preparation and execution leads to  
57 rather different predictions. Recordings of neural population activity in cortical motor  
58 areas of monkeys show that activity of neurons in the preparatory period may differ  
59 from that in the same neurons during execution (Churchland et al., 2010; Kaufman et  
60 al., 2014a). Preparatory activity is not a “subthreshold” version of that seen during  
61 execution and therefore, preparatory suppression would seem to be unnecessary  
62 (Kaufman et al., 2014b). Indeed, in human experiments, the degree of preparatory  
63 suppression was positively correlated to the RT, suggesting that, if anything,  
64 preparatory suppression was causally involved in preparation to move rather than in  
65 preventing its premature release (Hannah et al., 2018). Thus, preparatory suppression  
66 might be seen in SP and PT movements as well as in RT tasks.

67 Recordings of neural activity also show that all types of movement are preceded by the  
68 same patterns of activity consisting of a preparation period during which discharge rates  
69 change without any overt EMG activity in the periphery (Lara et al., 2018). This is  
70 followed by a transition to an execution phase that appears to be caused by a separate  
71 and non-specific timing signal (Haith et al., 2016; Kaufman et al., 2016a). If this timing

72 signal corresponds to an internal trigger for movement, then it may be susceptible to  
73 inter-sensory facilitation in SP and PT movements.

74 Our results show that both SP and PT movements display preparatory suppression of  
75 corticospinal excitability consistent with the idea that it is a necessary part of movement  
76 preparation rather than preventing premature release. SP movements also display inter-  
77 sensory facilitation-like effects, with onset times of speeded responses occurring earlier  
78 than predicted, suggesting that execution depends on some form of trigger. In contrast,  
79 PT movements do not display inter-sensory facilitation, which could indicate that there  
80 is active filtering of irrelevant sensory events that might distract from the internal  
81 trigger used in predictive timing.

## 82 **Materials and Methods**

### 83 *Participants*

84 In total, 28 right-handed, healthy participants (9 females,  $28 \pm 5$  years old, age range 19  
85 - 36 years) participated in this study. All of them reported no contraindications to TMS  
86 (Rossi et al., 2011) and had normal or corrected to normal visual acuity. The study was  
87 approved by the University College London Ethics Committee and warranted to be in  
88 accordance with the Declaration of Helsinki. All participants signed a written informed  
89 consent prior to the experimental session.

### 90 *Recordings*

91 Participants sat in a comfortable chair with both forearms resting on a pillow placed on  
92 their lap and index fingers resting on a keyboard which registered movement times. A  
93 screen was placed approximately one meter in front of them. Participants wore ear  
94 defenders during the TMS experiments to reduce the influence of loud sounds generated  
95 by the discharges of the TMS coils.

96 EMG signals were obtained from the right first dorsal interosseous (FDI) muscle for  
97 experiment 1 and of both hands in experiment 2. EMG activity from the right abductor  
98 digiti minimi (ADM) muscle was also recorded in the two experiments. MEPs recorded  
99 from the right FDI were the main outcome of this study. The ADM was used as a  
100 control muscle for the MEPs: it was activated by the TMS stimuli but, unlike the right  
101 FDI, it was not directly involved in the movement, so it was only supposed to show a  
102 monotonic reduction of excitability up until the time at which muscles showed  
103 voluntary activation (Duque et al., 2010). Surface recording electrodes were placed on  
104 the muscle bellies, with references on the closest metacarpophalangeal joint. The  
105 ground electrode was placed on the right wrist. EMG signals were amplified, band-pass  
106 filtered between 20 Hz and 2000 Hz (Digitimer D360, 2015 Digitimer Ltd, United  
107 Kingdom) and acquired at 5000 Hz sampling rate with a data acquisition board (CED-  
108 1401, Cambridge Electronic Design Ltd 2016) connected to a PC and controlled with  
109 the Signal and Spike<sup>2</sup> software (also by CED).

110 Once EMG sensors were set, the participants' TMS hotspot was located. This was done  
111 by finding the point over M1 giving the largest MEPs in the contralateral FDI for a  
112 given stimulus intensity. The TMS coil was always held at a 45° angle to the sagittal  
113 plane with the handle pointing backwards. Once the hotspot was found, the resting  
114 motor threshold (RMT) and 1 mV intensity were determined. The RMT was estimated  
115 by adjusting the TMS output until 5 out of 10 MEPs could be obtained over 50 µV. The  
116 1 mV intensity was defined as that able to elicit MEPs of around 1 mV amplitude. The  
117 experimental paradigms were implemented using custom-made Matlab routines  
118 (Mathworks, MA, USA). Synchronization of TMS pulses with EMG and movement

119 events was realised using Cogent 2000<sup>1</sup>'s utilities to control the parallel port of the PC  
120 running the experimental paradigms. Data analysis was carried out using custom-made  
121 Matlab functions and SPSS software (IBM, NY, USA).

### 122 **Experiment 1 – TMS recordings preceding RT and PT movements**

123 In this experiment, participants performed two types of movement paradigms: 1) a PT  
124 task in which movements were timed with an external countdown signal (Fig. 1-A); and  
125 2) a RT task in which movements were initiated following an imperative stimulus (Fig.  
126 1-B). During task execution, TMS pulses were delivered at predetermined time points  
127 relative to the average task- and subject-specific movement times to probe motor  
128 cortical excitability. The PT task consisted of a resting phase of 2 s followed by a delay  
129 period of 1 s during which four circles moved from the extremes of a cross towards its  
130 centre with a velocity inversely proportional to the remaining distance to the centre of  
131 the cross (initial distance 4.5 cm). Participants were instructed to time their movements  
132 with the merging of the circles so that button presses with the FDI were performed as  
133 soon as the circles fully overlapped. After each movement, the trial ended by giving  
134 participants feedback about the button press times. This feedback was displayed for a  
135 random period of time between 1-3 s, and it consisted of the time at which the button  
136 press had been detected, expressed in ms, and a font colour code indicative of the  
137 performance: green text was used for button presses done between 50-100 ms relative to  
138 the time at which circles overlapped, thus encouraging participants to aim at pressing  
139 the button within this interval; yellow text was used for button presses in the intervals 0-  
140 50 ms and 100-150 ms; finally, red text was used in any other case. Additionally,  
141 participants were given “too early” and “too late” messages when button presses were

---

<sup>1</sup> By Cogent 2000 team at the FIL and the ICN and Cogent Graphics developed by John Romaya at the LON at the Wellcome Department of Imaging Neuroscience

142 performed during the delay period or more than 200 ms after its end. The RT task had  
143 the same states with matched durations as the PT task but, in this case, the movement of  
144 the circles during the delay period followed a random and uninformative path along the  
145 four arms of the cross (Fig. 1). In this case participants were instructed to wait until the  
146 circles suddenly appeared in the centre of the cross, which was considered the “GO”  
147 cue. Participants were specifically asked to avoid any predictions of when the  
148 imperative cues were appearing. For that, they were told to specifically use the sudden  
149 overlapping of the circles in the centre of the screen to make a fast and reactive  
150 movement.

151 At the start of each task, participants practised the two paradigms until they showed  
152 consistent movement times. Thirty additional movements were then performed with  
153 each paradigm so that the subject- and task-specific average movement onset times  
154 (based on the FDI EMG activity) could be estimated. Then, the actual recording took  
155 place, consisting in two blocks per paradigm (interleaving the blocks of the two  
156 paradigms). In each block, six conditions were tested for 10 trials each, using a  
157 randomized order of conditions. These conditions differed from each other with regards  
158 to the timing of the TMS pulse: 1) no TMS delivered (control condition); 2) TMS at the  
159 beginning of the delay period (baseline condition); 3) TMS halfway through the delay  
160 period; 4) TMS 200 ms before the average movement onset time; 5) TMS 60 ms before  
161 the average movement onset time; and 6) TMS 30 ms before the average movement  
162 onset time.

### 163 **Experiment 2 – TMS during the resting phases between SP movements**

164 The task involved participants sitting still and comfortably, with both index fingers  
165 resting on buttons on a keyboard. They were instructed to make ballistic bilateral button  
166 presses every 4-8 seconds, whilst avoiding pre-movement muscle activation and



167 ensuring movements were made in a similar way along the whole experiment (Fig. 1-  
168 C). Movements of the left index finger (non-targeted by the TMS) allowed accurate  
169 estimates of the onset of voluntary movements (Schneider, 2004) without being affected  
170 by the TMS induced delays of voluntary actions in cases where the stimulus was given  
171 in close proximity with the intended movement onset time (Ziemann et al., 1997).  
172 Participants were instructed to perform their movements spontaneously and to avoid any  
173 form of internal countdown to decide when to initiate the movements. It was stressed to  
174 participants that they must not let the TMS pulses alter their decision to move. A resting  
175 period of time followed by a button press was considered a trial, and 12 blocks were  
176 performed by each participant with 65 trials making up a block. During blocks, EMG  
177 was monitored to ensure the hand was in a relaxed condition between movements.

178 A custom-made Matlab program was used to determine the timing of a TMS stimulus  
179 on a given trial based on the button press times registered in the previous 5 trials  
180 performed by each participant without TMS (this number of trials was empirically  
181 chosen to allow the code program to quickly adapt to changes in participants'  
182 behaviours). TMS pulse timing were distributed so that in 4% of the trials, stimuli were  
183 delivered early after the previous movement (3 s after the previous button press); 8% of  
184 the trials were non-TMS trials, which were then used to monitor inter-movement  
185 intervals in the absence of external stimuli along the experiment. Finally, in 82% of the  
186 trials, TMS pulse timings were defined based on the probability density function of  
187 inter-movement intervals considering the 5 most recent non-TMS trials. For that, a  
188 Gaussian fit was estimated and the next TMS firing time was selected according to the  
189 left-hand side of this probability density function. TMS firing times were thus  
190 programmed to be delivered at a time interval relative to the previous movement such  
191 that it was always below the average inter-movement interval estimated. It was

192 important to ensure that time intervals left by participants between button presses were  
193 not too long, as this would result in reduced chances of delivering TMS pulses at points  
194 in time close to the button presses. In the cases when participants waited for over 10 s  
195 between movements for 3-4 trials in a row, participants were given an indication by the  
196 experimenter to reduce the inter-movement time intervals.

### 197 **Analysis of results and statistics**

198 All the analyses were done using the onsets of the EMG as the reference points  
199 indicating the times of movement initiations. In order to obtain EMG references in each  
200 trial, the absolute value of the EMG recordings was estimated and then a moving  
201 average of 5 ms and a low pass filter ( $f_c < 5\text{Hz}$ ) were applied to obtain a smoothed  
202 envelope of the EMG signal. EMG recordings of all trials whilst the participant was at  
203 rest were analysed to obtain a subject-specific baseline level. A threshold set at five  
204 times the baseline value was used to determine EMG onset times. This level was also  
205 used to detect and remove trials with pre-TMS or pre-movement activation of all the  
206 muscles registered. All trials were then visually inspected and manually corrected to  
207 ensure that EMG-based movement onsets were estimated properly and that no building-  
208 up of EMG activity was apparent before the TMS pulses. Once trials were corrected,  
209 EMG onset times and peak to peak amplitudes of MEPs were estimated. MEP  
210 amplitudes were estimated from the acquired EMG signals without applying any  
211 additional filters. A logarithmic transformation of MEP amplitudes was performed  
212 before the statistical tests to ensure normality in the distributions of amplitudes.

213 In Experiment 1, MEP amplitudes and times of EMG onsets of all trials were labelled  
214 according to the type of paradigm (PT v RT) and to the time at which TMS was  
215 delivered. Movement onset times were referenced to the ones obtained with each  
216 participant in the control trials without TMS (subtracting the average movement onset

217 times). A two-way repeated measures ANOVA (rmANOVA) with factors TIME and  
218 PARADIGM was performed to test for changes in movement onset times. A three-way  
219 rmANOVA (TIME x PARADIGM x MUSCLE) was performed to test for changes in  
220 MEPs. Post-hoc comparisons were done between the baseline and 200 ms before  
221 movement TMS conditions.

222 In Experiment 2, two types of trials were extracted per session: TMS trials in which a  
223 TMS stimulus was delivered before the movement, and non-TMS trials in which no  
224 TMS pulse was scheduled so they could be used as control trials to define the correct  
225 times of subsequent TMS pulses. To check if TMS pulses were inadvertently used by  
226 the participants as cues to start the movements in TMS trials, we compared inter-  
227 movement intervals in TMS and non-TMS trials using a paired t-test. Additionally, to  
228 analyse the effect of TMS pulses on the times at which participants decided to move,  
229 non-TMS trials were used to simulate the length of the TMS-movement intervals had  
230 participants not been biased by TMS stimuli. To do this, all non-TMS trials obtained  
231 from each session were used by a simulation algorithm (5000 iterations) that: *i*)  
232 randomly selected 5 trials in each iteration; *ii*) obtained a simulated TMS time for the  
233 “next” trial in the same way as in the actual experiment; *iii*) randomly selected a new  
234 trial of the same participant; *iv*) obtained the time interval between the movement onset  
235 time and the simulated TMS time and kept it if it was positive (*i.e.*, if the TMS was  
236 delivered before the movement).

237 Regarding the TMS recordings in experiment 2, since the times of the MEPs relative to  
238 the posterior movements could not be well controlled (due to the free nature of SP  
239 movements), standard bootstrap statistics were applied to all participants’ MEPs  
240 recordings in order to identify, in an unbiased way, intervals of interest, *i.e.*, intervals  
241 that contained significant increases or decreases in MEP amplitudes. To do this, the

242 following steps were repeated for 100 iterations: 1) 200 TMS-trials per participant were  
243 chosen at random. Since the number of TMS trials obtained with each participant was  
244 different, this step balanced the influence of each participant's data when combining  
245 data from all participants. 2) MEPs selected from each participant were referenced to  
246 MEPs in the interval [-1500 : -500] ms relative to the onset of movements, *i.e.* MEPs  
247 were subtracted the mean and divided by the standard deviation of the MEPs in the  
248 defined interval. 3) MEP values from all participants were merged. 4) A sliding window  
249 of 40 ms in steps of 20 ms was applied from -1 s to the movement onset. For each  
250 window, 40 MEPs were picked at random with replacement (standard bootstrapping  
251 procedure) and used to calculate a mean. This was repeated 1000 times, thus generating  
252 1000 means for every window. These values were arranged in ascending order and the  
253 25<sup>th</sup> and 975<sup>th</sup> values were taken as confidence intervals. This whole process was  
254 repeated 100 times (using different sets of 200 trials per participant each time), and an  
255 average of all estimated confidence intervals was taken to produce the definitive  
256 confidence intervals of MEP changes across the time in preparation for the movements.  
257 Subsequently, a two-way rmANOVA was performed in SPSS with factors TIME and  
258 MUSCLE to test for changes in MEP amplitudes. Here, the TIME factor included the  
259 baseline period [-1500:-500] ms, and the periods of time in which significant decreases  
260 or increases of the right FDI MEPs were observed (*i.e.*, time intervals when both  
261 confident interval lines obtained from the previous bootstrap analysis were either  
262 positive or negative).

263 Overall, all results are reported as group mean  $\pm$  standard error of the mean (SEM).  
264 Bonferroni *post-hoc* corrections are applied in the cases of multiple comparisons. *P*  
265 values  $< 0.05$  are considered to be significant. The Greenhouse–Geisser procedure was  
266 applied where necessary to correct for violations of sphericity in rmANOVAs.

## 267 **Results**

### 268 **Experiment 1**

269 The average movement onset times (based on EMG) obtained in the baseline trials  
270 without TMS were  $-35 \pm 6$  ms and  $200 \pm 9$  ms for the PT and RT paradigms,  
271 respectively. The average time intervals between the estimated EMG onset times and  
272 the button press events were  $93 \pm 3$  ms (PT) and  $91 \pm 3$  ms (RT). Fig. 2 shows the  
273 observed average movement times in the two paradigms for different TMS firing times.  
274 There appear to be two main effects. First, if the TMS pulses are given 30 or 60ms prior  
275 to average movement times, then reactions are delayed. Previous work as ascribed this  
276 to the effect to the silent period following the TMS-evoked MEP. The second effect is  
277 that reaction times are reduced in the RT task when TMS pulses are given 200ms prior  
278 to average movement times at around the time of the imperative stimulus. Previous  
279 work refers to this as a form of intersensory facilitation caused by the auditory click and  
280 scalp stimulation from the TMS pulse.

281 These conclusions are borne out in the statistical analysis. rmANOVA showed a  
282 significant main effect of TIME ( $F_{[4,6]} = 18.154$ ;  $P < 0.001$ ), reflecting delayed  
283 responses when TMS pulses were delivered in proximity to the average movement  
284 times (*i.e.*, higher movement times were found when TMS pulses were delivered 60  
285 ms and 30 ms before the average movement times). In addition, there was a significant  
286 interaction of PARADIGM x TIME ( $F_{[4,6]} = 11.943$ ;  $P = 0.003$ ). Post-hoc comparison  
287 between paradigms for trials in which TMS pulses were delivered 200 ms before the  
288 average movement time revealed a significant reduction of the movement times in the  
289 RT movements relative to the PT (mean difference of  $-29.8 \pm 8.8$  ms;  $P = 0.008$ ). No

290 significant difference was found between paradigms for baseline TMS trials (mean  
291 difference  $-3.8 \pm 5.0$  ms;  $P = 0.473$ ).

292 Resting motor threshold and 1mV levels were  $53 \pm 3$  % and  $63 \pm 3$  % of the maximum  
293 stimulator output, respectively. Fig. 3 shows average MEP results. rmANOVA showed  
294 a main effect of factors MUSCLE ( $F_{[1,9]} = 8.327$ ;  $P = 0.018$ ; difference between FDI  
295 and ADM:  $0.7 \pm 0.2$  log( $\mu$ V)) and TIME ( $F_{[4,6]} = 5.731$ ;  $P = 0.010$ ). The post-hoc  
296 comparison between MEPs obtained from TMS pulses delivered either at the baseline  
297 point or 200 ms before the average movement times revealed a significant reduction of  
298 MEPs at the latter point (mean difference:  $-0.5 \pm 0.1$  log( $\mu$ V);  $P = 0.009$ ). There was a  
299 significant interaction of MUSCLE x TIME ( $F_{[4,6]} = 11.943$ ;  $P < 0.001$ ), due to the  
300 diverging directions of MEP changes in the FDI and ADM at the time of movement  
301 initiation (Duque et al., 2010). Post-hoc comparisons between baseline trials and trials  
302 with TMS delivered 200 ms before the average movement time revealed significant  
303 reductions of MEPs both in the FDI (mean difference  $-0.5 \pm 0.2$  log( $\mu$ V);  $P = 0.018$ )  
304 and in the task-irrelevant ADM (mean difference  $-0.4 \pm 0.1$  log( $\mu$ V);  $P = 0.040$ ). No  
305 significant differences were found in the reductions (TMS 200 ms before movements)  
306 of the FDI MEPs between the RT and PT paradigms ( $P = 0.590$ ). MEPs obtained with  
307 TMS pulses delivered 200 ms before average movement times relative to baseline  
308 MEPs showed an average reduction of 31 % and 35 % for PT and RT tasks,  
309 respectively.

## 310 **Experiment 2**

311 The average inter-movement intervals in TMS and non-TMS trials was  $4.94 \pm 0.16$  s  
312 and  $4.99 \pm 0.18$  s. A paired t-test on the inter-movement intervals of TMS and non-TMS  
313 trials revealed no significant difference between both conditions ( $P = 0.415$ ). Fig. 4

314 shows a comparison between real and simulated distributions (across all participants) of  
315 time intervals between TMS firing times and consecutive movement onset times. The  
316 experimental design was such that distribution of TMS times relative to the time of  
317 movement should reflect the left-hand side of a normal distribution (before movement),  
318 with the peak occurring close to the onset of movement. Instead, the obtained  
319 distributions show a trough around 300 ms followed by a peak at ~100 ms before the  
320 onset of the muscle activation. This suggests that, in trials in which TMS is delivered  
321 less than 300 ms before participants were about to move, movements were speeded,  
322 thus modifying the normal distribution expected to result from the design of the  
323 paradigm. The paired sample t-test returned significant differences between the  
324 simulated and the real distributions 300 ms before the onsets of the movements and in  
325 the interval [-150 ms : -50 ms] also relative to the movement ( $p < 0.001$  in both  
326 intervals). We refer to this speeding up as a form of intersensory facilitation.

327 Resting motor threshold and 1 mV levels were  $56 \pm 3$  % and  $66 \pm 4$  % of the maximum  
328 stimulator output, respectively. Fig. 5 shows the summary of the MEP results obtained  
329 both using bootstrap statistics on the grouped (z-scored) data and from the posterior  
330 comparison between the intervals of interest. The bootstrap analysis returned a  
331 significant ( $P < 0.01$ ) interval of MEP reduction that applied both to the FDI and the  
332 ADM muscles. For the FDI, this period with reduced MEPs peaked at -120 ms (relative  
333 to the estimated muscle activation onsets) and it was followed by an (also significant)  
334 increase of excitability towards the time of initiation of the movement. According to  
335 these results, the period of reduced excitability was defined to be at the time interval [-  
336 160 ms : -100 ms] relative to the movement (*i.e.*, the two consecutive 40 ms windows  
337 showing the strongest MEP reduction effects in the bootstrap analysis). Due to the lack  
338 of a dense enough population of MEPs at the late phase before movements were

339 initiated, we used the MEPs located within the final 80 ms interval before starting the  
340 movements as representative of the movement initiation phase (Pascual-Leone et al.,  
341 1992b; Chen and Hallett, 1999; Chen et al., 1999). rmANOVA showed main effects of  
342 MUSCLE ( $F_{[1,17]} = 26.246$ ;  $P < 0.001$ ; mean difference between FDI and ADM:  $1.0 \pm$   
343  $0.2 \log(\mu\text{V})$ ) and TIME ( $F_{[2,16]} = 9.046$ ;  $P = 0.01$ ). The post-hoc comparison of MEPs  
344 within the baseline and excitability reduction intervals revealed a significant reduction  
345 of MEPs at the latter time point (mean difference:  $0.3 \pm 0.1 \log(\mu\text{V})$ ;  $P = 0.006$ ). There  
346 was also a significant interaction of MUSCLE x TIME ( $F_{[2,16]} = 13.041$ ;  $P < 0.001$ ).  
347 Post-hoc comparisons between MEPs for baseline and reduced excitability conditions  
348 and for each muscle separately revealed a significant effect in both cases ( $P = 0.019$  for  
349 FDI;  $P = 0.020$  for ADM).

## 350 Discussion

351 In the present experiments we probed the temporal evolution of M1 excitability in  
352 paradigms with different constraints on movement initiation times. The results showed  
353 that reduced excitability can be observed prior to a voluntary movement whether it is  
354 self-paced, predictive or reactive. In addition, we found that TMS had distinct biasing  
355 effects on movement times across the different paradigms. While the initiation of a  
356 predictive movement was unaffected by TMS, RT and SP movements were speeded in a  
357 way resembling intersensory facilitation effects commonly reported in RT tasks  
358 (Nickerson, 1973). Overall, the results support the notion that preparatory cortical  
359 excitability changes in M1 do not have a direct functional role in preventing premature  
360 movement releases and they raise the question about the possible similarities of the  
361 mechanisms involved in triggering planned voluntary movements in the presence or  
362 absence of specific external cues.



363 *Different movement preparation paradigms exhibit similar patterns of preparatory M1*  
364 *excitability*

365 A comparison of the results obtained in the three paradigms tested here suggests a  
366 common temporal evolution of corticospinal excitability before movements, regardless  
367 of the nature of the trigger that initiates them. It has previously been hypothesized that  
368 M1 excitability reduction before movements reflects proactive control of motor cortical  
369 outputs preventing premature responses (Bestmann and Duque, 2015; Duque et al.,  
370 2017). However, this does not explain why we see the same premovement suppression  
371 prior to SP movements, in which there is explicitly no temporal constraint on initiation  
372 time. Strictly speaking, suppression is also unnecessary in the PT movements since if  
373 preparation was initiated at the correct time it would automatically evolve to reach  
374 threshold and initiate a movement to coincide with the external event. Only if  
375 suppression was used to reduce the variability of onset times would it serve a function.

376 Instead, our results appear a better fit for the alternative hypothesis that smaller  
377 responses reflect the dynamics of neural populations evolving towards more stable  
378 states from which to initiate movement (Churchland et al., 2010; Shenoy et al., 2013;  
379 Kaufman et al., 2014b, 2016b; Hannah et al., 2018). Recent studies in primates show  
380 that the time spent in this preparatory state can be compressed or extended depending  
381 on task demands (Lara et al., 2018). This observation might explain why we observed a  
382 peak in MEP suppression in SP movements which, relative to RT and PT movements,  
383 was shifted towards time points closer to the EMG onsets. It may also be relevant to the  
384 longer RTs in paradigms with unpredictable imperative stimuli (Alink et al., 2010).  
385 These could be explained by the need to make a transition through reduced excitability  
386 states after the imperative stimulus. Indeed, previous work has shown that, in reaction  
387 time tasks without prior warning cues, MEPs remain unchanged before the imperative

388 signal but show a marked suppression right after the onset of the imperative cue (Duque  
389 et al., 2014). Altogether, our results support the notion that MEP changes in preparation  
390 for movements can largely be explained as being a result of action- and state-specific  
391 M1 evolutions towards movement rather than being a reflection of proactive control  
392 mechanisms over M1.

393 The size and spatio-temporal patterns of the observed excitability reduction in  
394 preparation for movements, which was comparable across conditions, matched the  
395 results of previous TMS studies based on RT paradigms. On average, MEP amplitudes  
396 decreased by 30%, in line with changes reported before (Duque et al., 2014; Quoilin et  
397 al., 2016). The FDI muscle (task-relevant) presented deeper decreases of MEP  
398 amplitudes than the control ADM muscle across conditions, in agreement with previous  
399 research suggesting a somatotopic gradient in excitability changes related to the  
400 location, certainty and specificity of forthcoming actions (Greenhouse et al., 2015).

401 *Intersensory facilitation depends on the predictability of the imperative stimulus*

402 Different TMS biasing effects found in PT and RT movement times indicate that these  
403 paradigms differ with respect to how motor commands are withheld and/or released.  
404 Movement initiation in RT movements is contingent upon external cues and the link  
405 between sensory processing and release of motor programs is presumed to be direct  
406 (Pascual-Leone et al., 1992b). Speeded responses in RT movements induced by TMS  
407 have been interpreted as intersensory facilitation (Nickerson, 1973; Terao et al., 1997),  
408 and have been suggested to be due to a shortening of the time for identification of  
409 external stimuli as the go-signal (Pascual-Leone et al., 1992b). In eye movement  
410 paradigms with predictable onsets of imperative cues, previous studies have proposed  
411 that inner mechanisms aimed at anticipating the timing of the environmental cues need  
412 to be deployed and used to trigger motor commands (Janssen and Shadlen, 2005; Badler

413 and Heinen, 2006). Based on this, in the PT task tested here the lack of speeded  
414 responses can be attributed to the usage of an alternative mechanism to trigger  
415 movements, which is internally driven, once the timing of external stimuli is learned. In  
416 this case, external signals during the delay period of PT movements may be either  
417 downregulated (Alink et al., 2010) or simply disregarded (Rohenkohl et al., 2012).

#### 418 *Biasing effects of TMS in SP movements*

419 Analysing brain responses to external stimuli before SP movements with a degree of  
420 temporal precision is technically challenging and only few studies have attempted it.  
421 Wasaka and colleagues used a SP paradigm to show that sensory suppression processes  
422 in these actions partially resembled those seen in preparation for RT movements  
423 (Shimazu et al., 1999; Wasaka et al., 2003). Castellote and colleagues showed that  
424 StartReact responses during the resting periods before self-initiated movements are  
425 closely similar to StartReact responses in RT paradigms (Valls-Sole et al., 1999;  
426 Castellote et al., 2013). Interestingly, Castellote's experiment showed a biasing effect of  
427 startling stimuli on movement times that tightly resembles that obtained here (Fig. 3),  
428 *i.e.*, if delivered with a certain anticipation (~300 ms) before the forthcoming  
429 movements, the startling stimuli speed-up the release of the required movements. In that  
430 work, the features of the responses matched those obtained in StartReact paradigms  
431 using RT tasks, which allowed authors to suggest that the mechanisms engaged in the  
432 preparation for SP and cue-driven actions could share common elements (Castellote et  
433 al., 2013). In our case, the intensity of the applied stimuli (1 mV TMS and participants  
434 using ear defenders, which lessen the likelihood of startle response) suggests that the  
435 observed effects are closer to intersensory facilitation (Pascual-Leone et al., 1992b,  
436 1992a). Precisely quantifying how much movements are sped-up would help verify this  
437 idea (Valls-Sole et al., 2008), but doing so is challenging because of the lack of a more

438 precise knowledge about when movements would be performed in the absence of  
439 external stimuli. Based on the fact that stimuli used in the RT and SP paradigms were  
440 equal and responses to TMS comparable, it is conceivable that effects observed in both  
441 cases reflect the use of a similar neural strategy to trigger actions that is not shared by  
442 PT movements.

443 *Technical considerations and future work*

444 Studying corticospinal changes before SP movements with TMS has inherent  
445 limitations. We were able to obtain movement times and MEPs in our SP paradigm  
446 despite the apparent difficulties in accurately probing excitability at specific, well-  
447 defined times relative to movement onset. However, unlike with cue-guided  
448 movements, the estimations of TMS times (relative to the movements) in the SP  
449 paradigm were done based on the times of the subsequent movements of the non-  
450 stimulated hand, which also presents intersensory facilitation effects (Hannah et al.,  
451 2018), is not affected by cortical silent period-related delaying effects (Ziemann et al.,  
452 1997), but may still have been biased by the TMS pulse in a different way than the  
453 stimulated side. Therefore, precise estimations of the excitability reduction peak time in  
454 this case are not definitive.

455 Previous studies testing the possible contribution of spinal mechanisms to the decrease  
456 seen in MEP amplitudes in preparation for movements in reaction time tasks have led to  
457 contradictory results (Duque et al., 2010; Lebon et al., 2016; Hannah et al., 2018). The  
458 techniques used here to probe corticospinal excitability do not allow measuring whether  
459 spinal inhibitory processes are taking place in preparation for movements performed in  
460 the three paradigms tested. Knowing if and how spinal inhibition applies to cue-driven  
461 and SP movements could help further proving the hypothesis that observed preparatory

462 changes are not driven by proactive control mechanisms. Such analysis should be  
463 addressed in future work.

#### 464 *Conclusions*

465 Taken together, results from the three compared paradigms suggest that TMS  
466 recordings of excitability changes in preparation for planned movements share a  
467 common temporal profile, likely reflecting aspects of neural population-level changes to  
468 generate the desired actions. Results also suggest possible shared neural mechanisms  
469 involved in triggering reaction time and self-paced movements that are different from  
470 those in actions timed with fully predictable cues.

#### 471 **Acknowledgments**

472 We gratefully acknowledge the technical assistance of Paul Hammond. We also thank  
473 Arisa Reka for assistance in collection of data in Experiment 2.

#### 474 **References**

- 475 Alink A, Schwiedrzik CM, Kohler A, Singer W, Muckli L (2010) Stimulus Predictability Reduces  
476 Responses in Primary Visual Cortex. *J Neurosci* 30:2960–2966.
- 477 Badler JB, Heinen SJ (2006) Anticipatory Movement Timing Using Prediction and External Cues. *J*  
478 *Neurosci* 26:4519–4525.
- 479 Bestmann S, Duque J (2015) Transcranial Magnetic Stimulation: Decomposing the Processes Underlying  
480 Action Preparation. *Neurosci*:1–14.
- 481 Castellote JM, Van Den Berg MEL, Valls-Sole J (2013) The startreact effect on self-initiated movements.  
482 *Biomed Res Int* 2013.
- 483 Chen R, Corwell B, Hallett M (1999) Modulation of motor cortex excitability by median nerve and digit  
484 stimulation. *Exp Brain Res* 129:77–86.
- 485 Chen R, Hallett M (1999) The time course of changes in motor cortex excitability associated with  
486 voluntary movement. *Can J Neurol Sci* 26:163–169.
- 487 Churchland MM, Cunningham JP, Kaufman MT, Ryu SI, Shenoy K V. (2010) Cortical Preparatory  
488 Activity: Representation of Movement or First Cog in a Dynamical Machine? *Neuron* 68:387–400.
- 489 Duque J, Greenhouse I, Labruna L, Ivry RB (2017) Physiological Markers of Motor Inhibition during  
490 Human Behavior. *Trends Neurosci* 40:219–236.
- 491 Duque J, Labruna L, Cazares C, Ivry RB (2014) Dissociating the influence of response selection and task  
492 anticipation on corticospinal suppression during response preparation. *Neuropsychologia* 65:287–  
493 296.
- 494 Duque J, Lew D, Mazzocchio R, Olivier E, Ivry RB, Louvain D, Brussels B-, Clinica N (2010) Evidence  
495 for Two Concurrent Inhibitory Mechanisms during Response Preparation. *J Neurosci* 30:3793–

- 496 3802.
- 497 Greenhouse I, Sias A, Labruna L, Ivry RB (2015) Nonspecific Inhibition of the Motor System during  
498 Response Preparation. *J Neurosci* 35:10675–10684.
- 499 Haith AM, Pakpoor J, Krakauer JW (2016) Independence of Movement Preparation and Movement  
500 Initiation. *J Neurosci* 36:3007–3015.
- 501 Hannah R, Cavanagh XSE, Tremblay S, Simeoni S, Rothwell XJC (2018) Selective Suppression of Local  
502 Interneuron Circuits in Human Motor Cortex Contributes to Movement Preparation. 38:1264–1276.
- 503 Hasbroucq T, Kaneko H, Akamatsu M, Possamaï C-A (1997) Preparatory inhibition of cortico-spinal  
504 excitability: a transcranial magnetic stimulation study in man. *Cogn Brain Res* 5:185–192.
- 505 Janssen P, Shadlen MN (2005) A representation of the hazard rate of elapsed time in macaque area LIP.  
506 *Nat Neurosci* 8:234–241.
- 507 Kaufman MT, Churchland MM, Ryu SI, Shenoy K V. (2014a) Cortical activity in the null space:  
508 permitting preparation without movement. *Nat Neurosci* 17:440–448.
- 509 Kaufman MT, Churchland MM, Ryu SI, Shenoy K V. (2014b) Cortical activity in the null space:  
510 Permitting preparation without movement. *Nat Neurosci* 17:440–448.
- 511 Kaufman MT, Seely JS, Sussillo D, Ryu SI, Shenoy K V., Churchland MM (2016a) The Largest  
512 Response Component in the Motor Cortex Reflects Movement Timing but Not Movement Type.  
513 *eNeuro* 3.
- 514 Kaufman MT, Seely JS, Sussillo D, Ryu SI, Shenoy K V., Churchland MM (2016b) The Largest  
515 Response Component in the Motor Cortex Reflects Movement Timing but Not Movement Type.  
516 *eNeuro* 3.
- 517 Lara AH, Elsayed GF, Zimnik AJ, Cunningham J, Churchland MM (2018) Conservation of preparatory  
518 neural events regardless of how movement is initiated. *Elife*:7:e31826.
- 519 Lebon F, Greenhouse I, Labruna L, Vanderschelden B, Papaxanthis C, Ivry RB (2016) Influence of Delay  
520 Period Duration on Inhibitory Processes for Response Preparation. *Cereb Cortex* 26:2461–2470.
- 521 Nickerson RS (1973) Intersensory facilitation of reaction time: Energy summation or preparation  
522 enhancement? *Psychol Rev* 80:489–509.
- 523 Omrani M, Kaufman MT, Hatsopoulos NG, Cheney PD (2017) Perspectives on classical controversies  
524 about the motor cortex. *J Neurophysiol*:jn.00795.2016.
- 525 Pascual-Leone A, Brasil-neto J, Valls-Sole J, Cohen LG, Hallett M (1992a) Simple reaction time to focal  
526 transcranial magnetic stimulation. *Brain*, 115, 109-122 :109–122.
- 527 Pascual-Leone A, Valls-Sole J, Wassermann EM, Brasil-neto J, Cohen LG, Hallett M (1992b) Effects of  
528 Focal Transcranial Magnetic Stimulation on Simple Reaction Time To Acoustic , Visual and  
529 Somatosensory stimuli. *Brain* 115:1045–1059.
- 530 Prut Y, Fetz EE (1999) Primate spinal interneurons show pre-movement. *Nature* 401:590–594.
- 531 Quoilin C, Lambert J, Jacob B, Klein PA, Duque J (2016) Comparison of motor inhibition in variants of  
532 the instructed-delay choice reaction time task. *PLoS One* 11:1–16.
- 533 Rohenkohl G, Cravo AM, Wyart V, Nobre AC (2012) Temporal Expectation Improves the Quality of  
534 Sensory Information. *J Neurosci* 32:8424–8428.
- 535 Rossi S, Hallett M, Rossini P, Pascual-Leone A (2011) Screening questionnaire before TMS: An update.  
536 *Clin Neurophysiol* 122:1686.
- 537 Schneider C (2004) Timing of cortical excitability changes during the reaction time of movements  
538 superimposed on tonic motor activity. *J Appl Physiol* 97:2220–2227.
- 539 Shenoy K V., Sahani M, Churchland MM (2013) Cortical Control of Arm Movements: A Dynamical  
540 Systems Perspective. *Annu Rev Neurosci* 36:337–359.
- 541 Shimazu H, Kaji R, Murase N, Kohara N, Ikeda A, Shibasaki H, Kimura J, Rothwell JC (1999) Pre-  
542 movement gating of short-latency somatosensory evoked potentials. *Neuroreport* 10:2457–2460.
- 543 Tanji J, Evarts E V (1976) Anticipatory activity of motor cortex neurons in relation to direction of an  
544 intended movement. *J Neurophysiol* 39:1062–1068.
- 545 Terao Y, Ugawa Y, Suzuki M, Sakai K, Hanajima R, Gemba-Shimizu K, Kanazawa I (1997) Shortening

- 546 of simple reaction time by peripheral electrical and submotor-threshold magnetic cortical  
547 stimulation. *Exp Brain Res* 115:541–545.
- 548 Touge T, Taylor JL, Rothwell JC (1998) Reduced excitability of the cortico-spinal system during the  
549 warning period of a reaction time task. *Electroencephalogr Clin Neurophysiol* 109:489–495.
- 550 Valls-Sole J, Kumru H, Kofler M (2008) Interaction between startle and voluntary reactions in humans.  
551 *Exp Brain Res* 187:497–507.
- 552 Valls-Sole J, Rothwell JC, Goulart F, Cossu G, Muñoz E (1999) Patterned ballistic movements triggered  
553 by a startle in healthy humans. *J Physiol* 516:931–938.
- 554 Wasaka T, Hoshiyama M, Nakata H, Nishihira Y, Kakigi R (2003) Gating of somatosensory evoked  
555 magnetic fields during the preparatory period of self-initiated finger movement. *Neuroimage*  
556 20:1830–1838.
- 557 Ziemann U, Tergau F, Netz J, Hömberg V (1997) Delay in simple reaction time after focal transcranial  
558 magnetic stimulation of the human brain occurs at the final motor output stage. *Brain Res* 744:32–  
559 40.
- 560

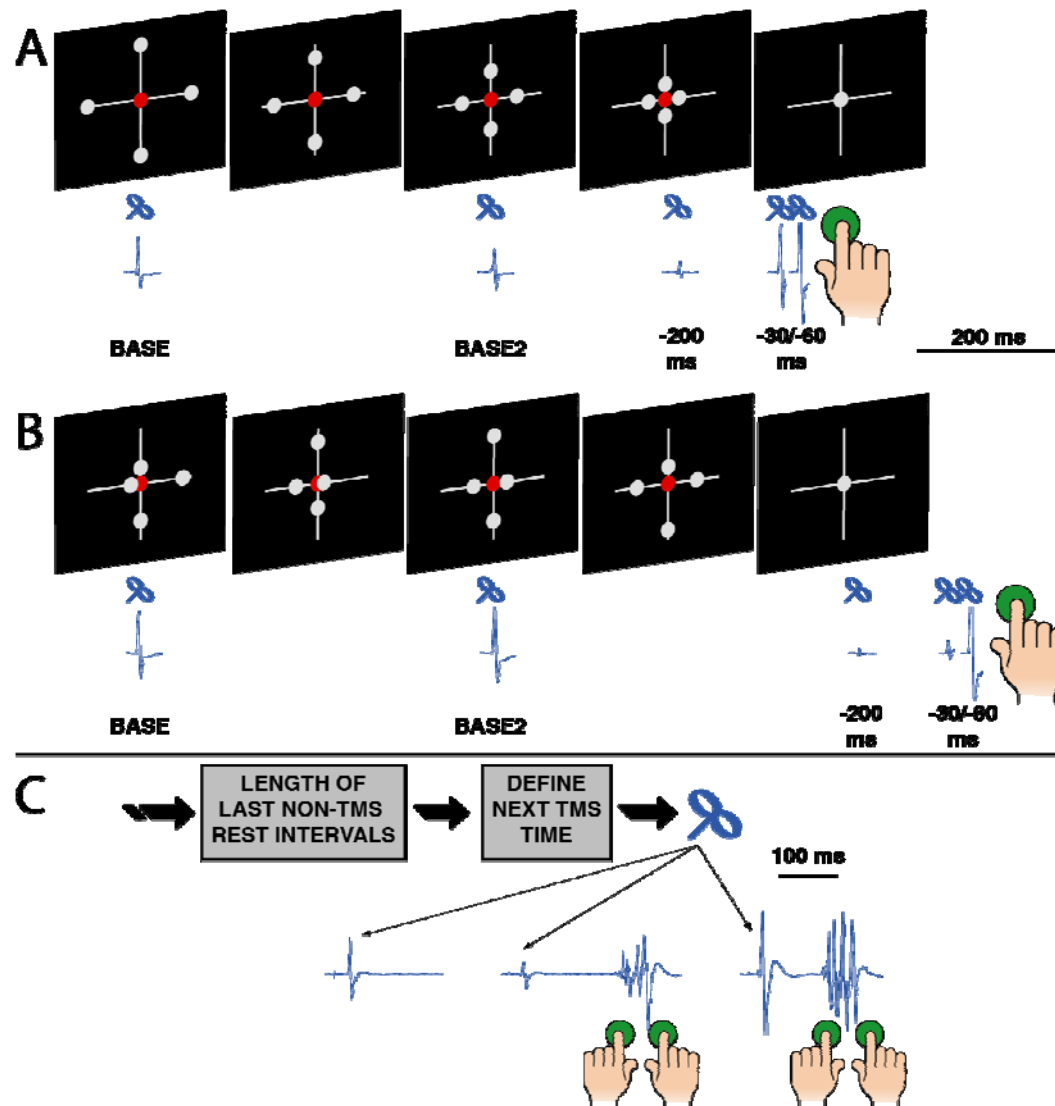

**Figure 1.** Movement initiation tasks and TMS recordings. (A) In PT movements - experiment 1- participants had to press a button with their index finger after the end of a 1-s countdown (the time it took the 4 white circles to reach the centre of the cross). (B) In RT movements -experiment 1- participants had to perform the same movement as in the PT task, but here they were specifically instructed to perform movements in response to seeing the 4 white circles suddenly appearing on the centre of the cross. During the 1-s delay period in this case, circles moved randomly along the arms of the cross. Both in PT and RT movements, single-pulse TMS was delivered when the four



circles appeared on the screen at the beginning of the delay period (BASELINE), half way through the delay period and 200/60/30 ms before the average movement times in each subject and for each task. (C) In experiment 2, participants performed SP movements consisting in simultaneously pressing two keyboard buttons with the index fingers of their two hands. An algorithm was run in parallel to characterize the times at which movements were performed in the non-TMS trials. This information was in turn used to distribute TMS pulses in subsequent TMS trials with different time intervals between the stimuli and the movements.

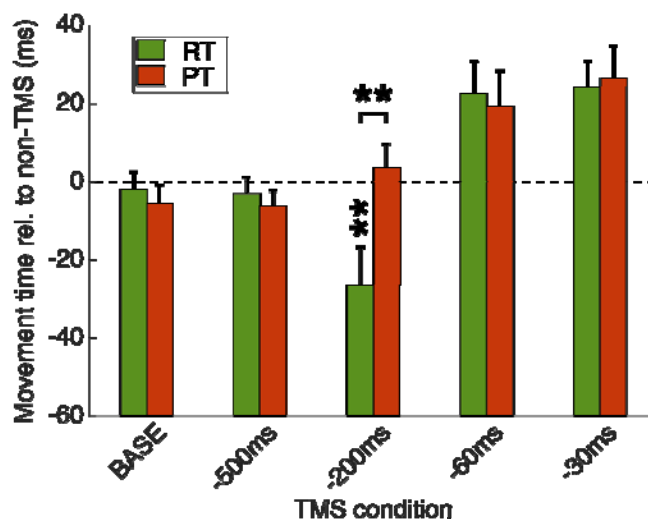

**Figure 2.** Means and SEs of the movement times (relative to non-TMS trials) for the RT (green) and PT (red) tested in Experiment 1. (\*\* indicates  $P < 0.01$ )

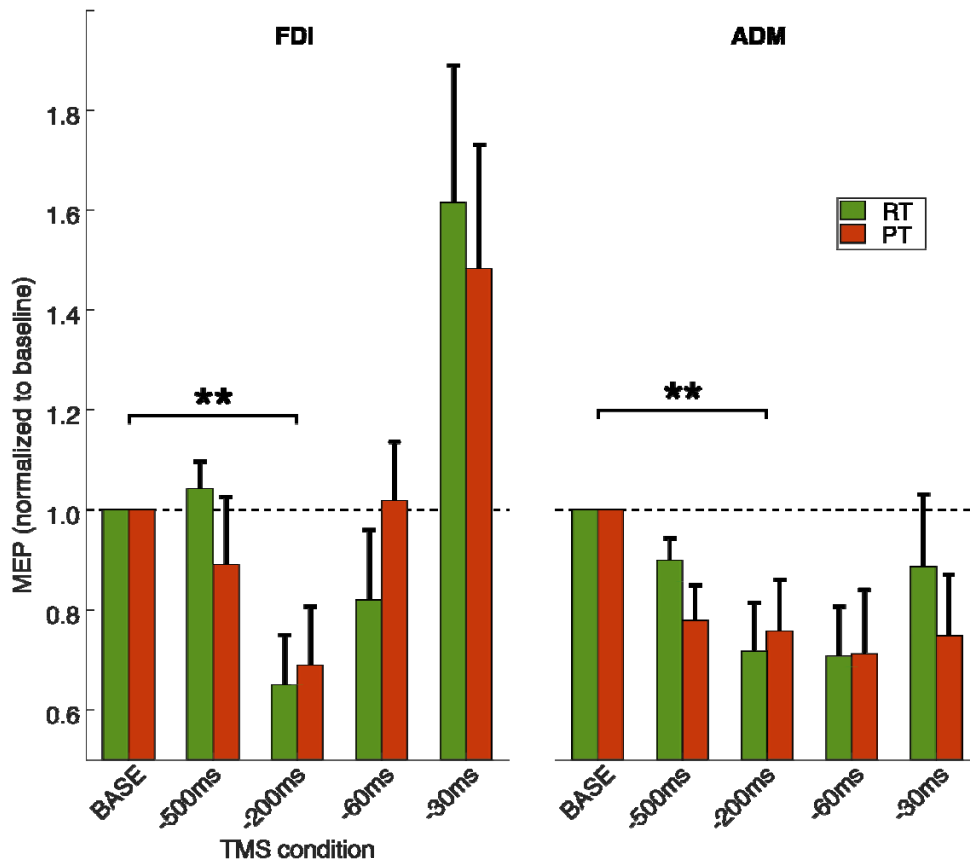

**Figure 3.** Normalized means and SEs of the FDI (left panel) and ADM (right panel) MEP amplitudes in RT (green) and PT (red) movements tested in Experiment 1. The found significant difference in MEPs between baseline and -200 ms TMS time conditions is indicated as well. (\*\* indicates  $P < 0.01$ )

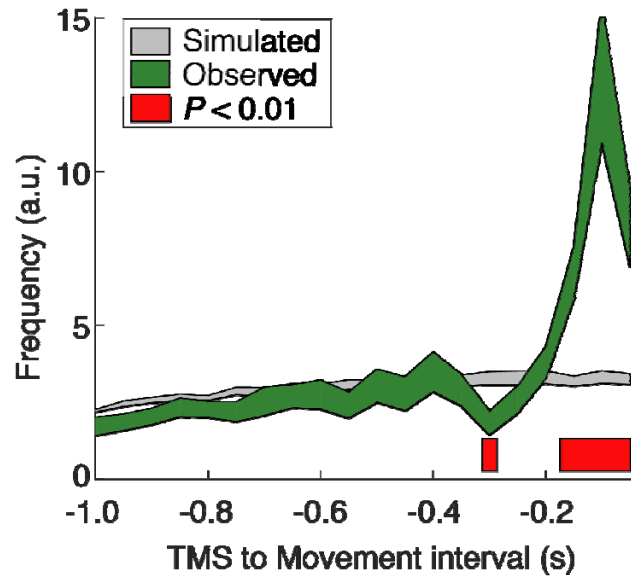

**Figure 4.** Upper and lower confidence limits (black lines) of the observed intervals between the TMS trigger times and the subsequent movement onset times in the SP paradigm (green). The simulated frequencies based on the non-TMS trials are represented in grey. The horizontal red bars represent time points in which a significant ( $P < 0.01$ ) difference between the two distributions is observed.

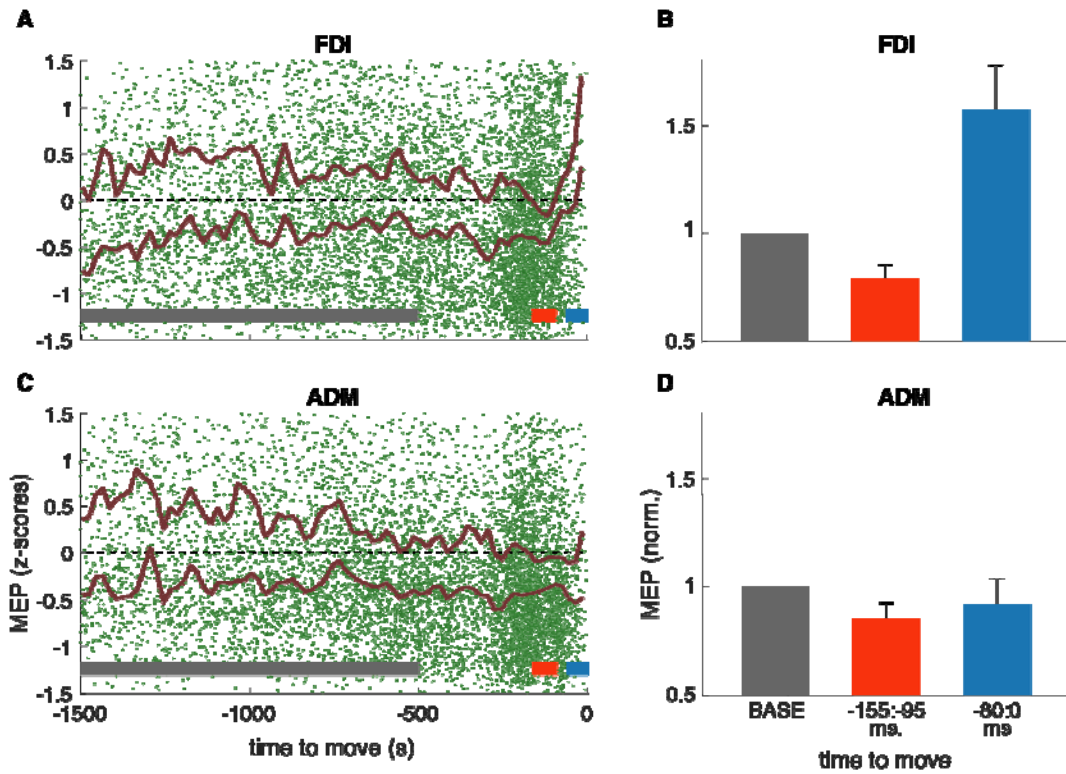

**Figure 5.** Changes in the FDI (A) and ADM (C) MEPs across time before movements in the SP paradigm. Grey dots show normalized MEP amplitudes (all subjects and trials). Red traces represent the upper and lower confident limits obtained using a bootstrap analysis with all data points ( $p < 0.001$ ). Bars at the bottom identify three intervals of interest used to extract MEPs for a subsequent group level rmANOVA. These are aimed to contain MEPs observed at baseline (grey), and during the periods of reduced excitability –black- and movement initiation phase (white). Normalized group means and SEs of FDI (B) and ADM (D) MEP amplitudes in the three selected intervals of interest.
